# Supplementary material for: Clinically Significant Cytochrome P450-Mediated Drug-Drug Interactions in Children Admitted to Intensive Care Units
Source: Int J Clin Pract. 2022 Aug 23;2022:2786914. doi: 10.1155/2022/2786914 (PMC9427250; doi:10.1155/2022/2786914)
Supplement: (Supplementary Materials) — The diagnostic criteria for adverse reactions based on laboratory test results used in this study are found as supplementary methods. Information on CYP-mediated pDDI pairings included in this study could be found in supplementary table. [file 2786914.f1.zip]

Archive with 2 entries (2 files):
- 2786914.f1/Supplementary methods.docx
- 2786914.f1/Supplementary table.docx
